# Supplementary material for: Dynamics and stability of directional jumps in the desert locust
Source: PubMed Central journal article supplement (PMC5045875; doi:10.7717/peerj.2481), 2016-09-28
Supplement: peerj-04-2481-s005.pdf [file peerj-04-2481-s005.pdf]

1 **Supplementary text**

2 **Coordinate systems and kinematic analysis.** Four coordinate systems were defined in order  
3 to analyse data obtained from the video (Fig. S1): (1) the video coordinate system was attached  
4 to the jumping platform and the marker positions digitized from the videos are expressed in this  
5 system. (2) The ground coordinate system was attached to the locust's hind-leg contact points  
6 with the jumping platform. The  $\hat{x}$  and  $\hat{y}$  axes of this frame were established by a line  
7 connecting the hind-leg contact points and the  $\hat{z}$  axis was set perpendicular to the jumping  
8 platform (Fig S1), its origin was set midway between the two contact points. Defining these  
9 two coordinate systems enabled us to differentiate between jumps in which the locust had  
10 rotated its whole body, including the hind-leg contact points, from jumps in which the body  
11 was rotated while the hind-leg contact points were kept stable (the latter was the common case  
12 in escape jumps). (3) The pronotum coordinate system was attached to the locust body. The  
13 origin of this frame was set midway between the two markers at the base of the pronotum. The  
14  $xy$  plane was set to coincide with the dorsal surface of the pronotum. (4) The locust coordinate  
15 system was similar in orientation to the pronotum system but its origin was translated to midway  
16 between the TC joints. Establishing the origin and the axes of this frame in this manner  
17 simplified calculations and is common practice in robot modelling, where reference frame  
18 origins are set at joints, and axes are collinear with rotation axes. The jump trajectory is  
19 expressed as the translation and rotation of the locust system with respect to the ground system.  
20 Translation is described in spherical coordinates (Fig S1) and rotations are described using the  
21 intrinsic yaw-pitch-roll (YPR) rotation sequence convention.

22 After marker coordinates were obtained from the videos for each jump, the jump trajectory was  
23 reconstructed. The axes vectors of the ground coordinate system were computed:

$$\hat{y}_g = \frac{G_l - G_r}{\|G_l - G_r\|}; \hat{z}_g = \hat{e}_3; \hat{x}_g = \hat{y}_g \times \hat{z}_g$$

24 Where:  $G_l$  and  $G_r$  are the left and right hind legs' ground contact points respectively.

25 The pronotum system's origin, axes were computed:

$$O_p = \frac{1}{2}(m_2 + m_3); \hat{x}_p = \frac{m_1 - O_p}{\|m_1 - O_p\|}; \hat{y}_p = \frac{m_2 - m_3}{\|m_2 - m_3\|}; \hat{z}_p = \hat{x}_p \times \hat{y}_p$$

26 Where:  $m_1$ ,  $m_2$  and  $m_3$  are the three markers drawn on the locust's pronotum.

27 Because the locust and the pronotum systems have the same orientation, their axes were in the  
28 same directions and their direction cosine matrices (DCM) with respect to the ground system

29 were equal. In each frame the instantaneous DCM (matrix  $R$ ) was calculated (Diebel, 2006)  
 30 and then used for transforming vectors from the ground to the locust system and the yaw, pitch  
 31 and roll angles were also calculated through it. The digitized position of the TC joint was used  
 32 to calculate the vector from the origin of the pronotum system to that of the locust system:

$$33 \quad a_g = \text{TC}_{\text{left}} - O_p; a_l = R \cdot a_g;$$

34 Assuming that the locust body is symmetrical with respect to a vertical plane coinciding with  
 35 its longitudinal axis, the vector  $b_l$  connecting  $O_p$  to  $O_l$  was constructed by eliminating the  
 36 second component of  $a_l$ .  $a_l$  was independently calculated in four different video frames and  
 37 averaged to reduce error. The instantaneous position of the locust system could be found and  
 38 described in spherical coordinates:

$$39 \quad O_l = O_p - R^T \cdot b_l; \alpha = a \tan 2(O_l^y, O_l^x); \beta = a \tan 2(O_l^z, \sqrt{O_l^x + O_l^y}); r = \|O_l\|$$

40 Calculation of velocities was conducted by numerically differentiating the time varying  
 41 position and Euler angles. To find the kinematics as experienced by the locust, the Euler angle  
 42 time derivative were transformed to rotational velocities about the ground system axis, and  
 43 then multiplied by the DCM to rotate to the locust system:

$$44 \quad \omega_g = \begin{bmatrix} \dot{\psi} \cos(\theta) \cos(\phi) - \dot{\theta} \sin(\phi) \\ \dot{\psi} \cos(\theta) \sin(\phi) + \dot{\theta} \cos(\phi) \\ \dot{\phi} - \dot{\psi} \sin(\theta) \end{bmatrix}; \omega_l = R \cdot \omega_g$$

45

46

## 47 **References**

48 Diebel J. 2006. Representing attitude: Euler angles, unit quaternions, and rotation vectors.  
 49 Matrix 58:1516.

50

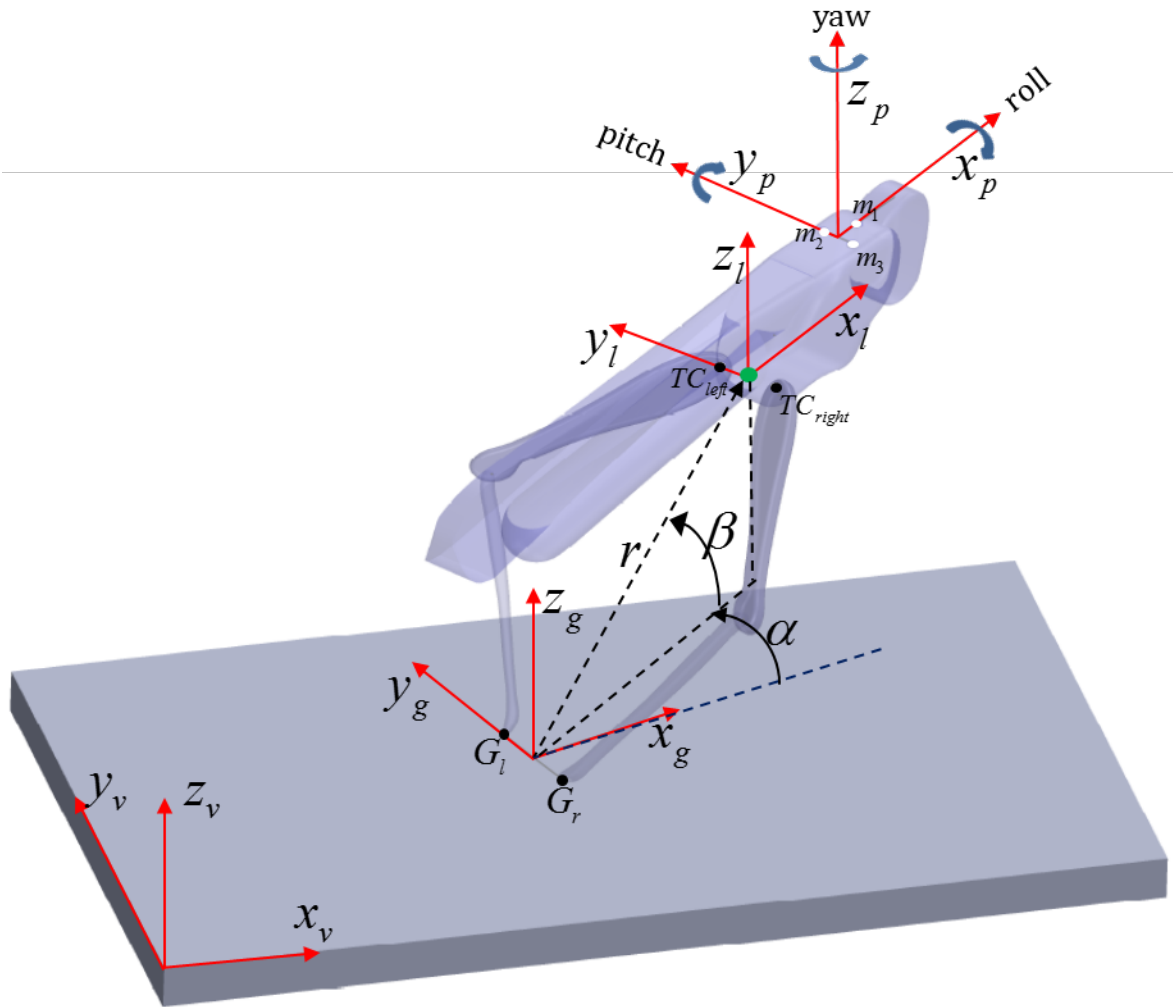

51

52

53 **Fig. S1.**

54 **Definition of coordinate systems for kinematic analysis.** The positions of markers  
 55  $m_1, m_2, m_3$  obtained from video analysis are expressed in the video coordinate system  
 56  $(x_v, y_v, z_v)$ . The pronotum system  $(x_p, y_p, z_p)$  is set according to the marker positions. The  
 57 ground system  $(x_g, y_g, z_g)$  is set according to the contact points of the hind legs with the  
 58 ground  $(G_l, G_r)$ . The locust system  $(x_l, y_l, z_l)$  is parallel to the pronotum system and  
 59 positioned between the TC joints  $(TC_{left}, TC_{right})$ . During the jump, the locust position is the  
 60 difference between the origins of the locust and ground systems expressed in spherical  
 61 coordinates  $(\alpha, \beta, r)$ .

62

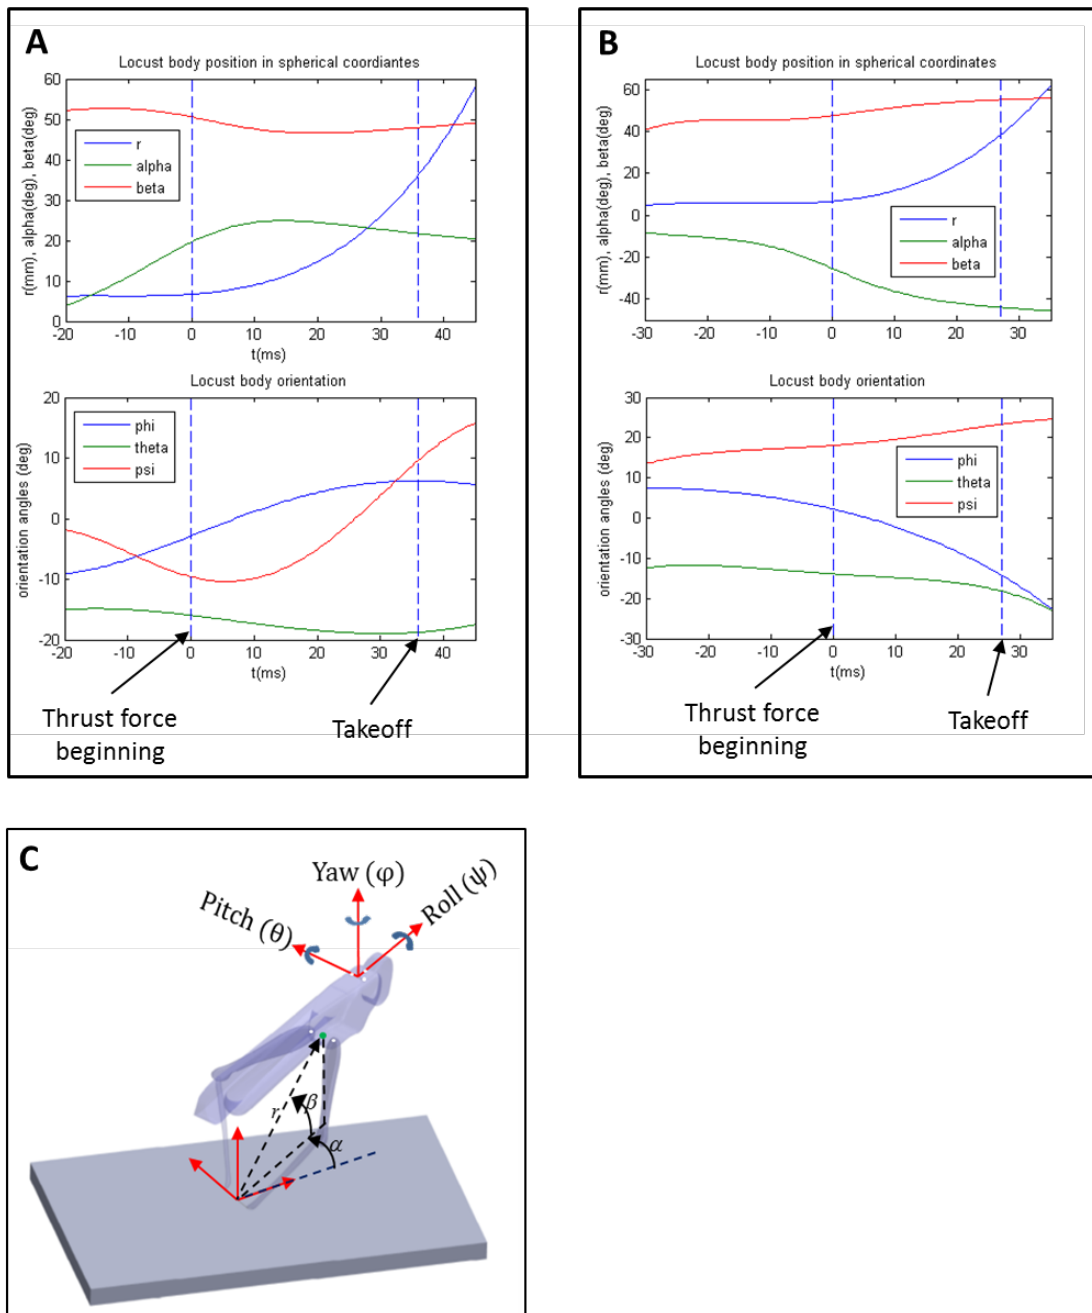

64

65

66 **Fig. S2.**

67 **Time-course of two jumps from the beginning of the aiming manoeuvres till takeoff.** Each  
 68 jump is represented by two graphs: the upper graph describes the position of the locust and the  
 69 bottom graph describes the locust's orientation. Two vertical dashed lines mark important  
 70 events during the jump: The left line marks the moment when the hind legs start exerting thrust  
 71 on the body. This moment was measured by noting the first frame in which the hind legs started  
 72 to extend in each jump video. The right line marks the moment when the hind legs' thrust force

73 ends. This moment was measured by noting the frame in which the hind legs lost contact with  
 74 the ground in each jump video. An image of the locust and the six coordinates describing its  
 75 location and orientation are presented in figure S2.C for. A. First jump- The aiming  
 76 manoeuvres begin about 20 milliseconds before the thrust force begins. During this phase the  
 77 locust's position changes only by changing the  $\alpha$  angle between approximately 4 degrees at  
 78 the beginning of the aiming maneuver to approximately 20 degrees when the thrust starts.  
 79 Meanwhile, during the same phase the locust changes its orientation: The pitch angle ( $\theta$ )  
 80 almost does not change; The yaw angle ( $\varphi$ ) changes from approximately 9 degrees to the right  
 81 to 0 degrees. The roll angle ( $\psi$ ) changes from approximately 2 degrees to the left to 10 degrees  
 82 to the left. Notice that the average velocity in which the roll was changed is approximately 400  
 83 degrees per second. In the second phase, the thrust phase, which takes place from the beginning  
 84 of the thrust application till takeoff, the main change in the locust's position is its propagation,  
 85 which can be seen in the rise of  $r$  at approximately 30mm till takeoff. During this phase also  
 86 the orientation of the locust changes: The pitch and yaw angles ( $\theta$  and  $\psi$ , respectively)  
 87 continue changing in the same velocity till about 10 milliseconds before takeoff, when their  
 88 velocity starts to reduce. The roll ( $\psi$ ) on the other hand, changes direction and develops a  
 89 higher velocity than in the previous phase. The change in roll in this phase is probably the result  
 90 of torques produced by the thrust force. B. Additional jump time-course. C. Locust model with  
 91 coordinate notations.

92

93

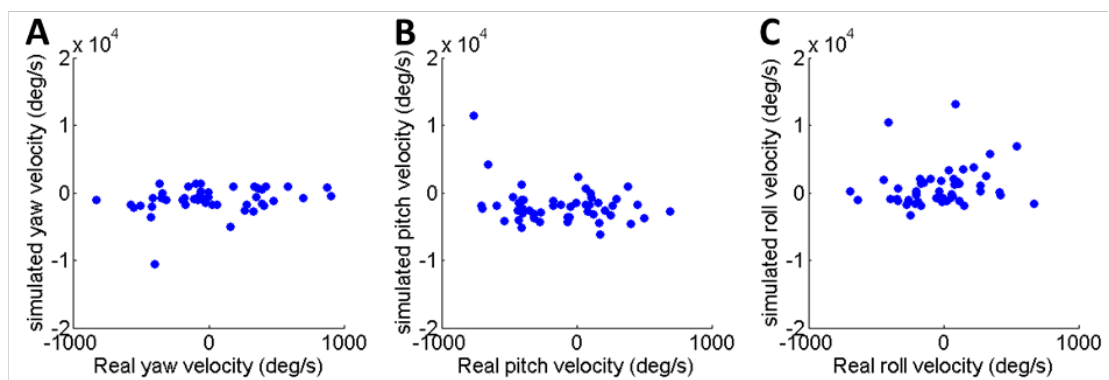

94

95 **Fig. S3.**

96 **Comparison of rotational velocity at take-off between real and simulated jumps:** A. Yaw  
 97 velocity. B. Pitch velocity. C. Roll velocity. Please note that the x and y axes are not in the same  
 98 scale.

99

100

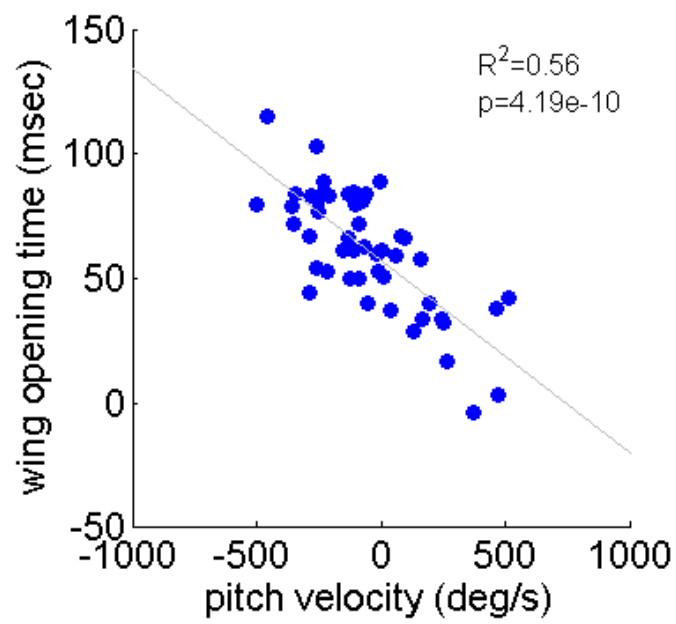

101

102 **Fig. S4.**

103 **The timing of flight initiation as a function of pitch velocity measured 15 msec before**  
104 **take-off.** The lines denote linear regression (Analysis of variance of linear model, *F*-test).

105
